# Supplementary material for: Thermal hysteresis induced by external pressure in a 3D Hofmann-type SCO-MOF
Source: Royal Society of Chemistry journal article supplement (doi:10.1039/d0dt03796f), 2020-12-23
Supplement: d0dt03796f1.pdf [file d0dt03796f1.pdf]

Supporting Information

for

**Thermal hysteresis induced by external pressure in a 3D Hofmann-type SCO-MOF**

Yue Li,<sup>a\*</sup> Qing-Rong Kong,<sup>a</sup> Ying Guo,<sup>a</sup> Zheng Tang<sup>b</sup>

<sup>a</sup>*College of Chemistry and Chemical Engineering, Xiamen University, Xiamen 361005, Fujian Province, People's Republic of China. E-mail: liyue1105@sina.cn*

<sup>b</sup>*Key Laboratory of Cluster Science of Ministry of Education, School of Chemistry and Chemical Engineering, Liangxiang Campus, Beijing Institute of Technology, Beijing 102488, People's Republic of China.*

Table S1. Crystal structure and refinement details for compounds **1** and **2** at different temperature.

|                                      | Compound 1                                                                        |             | Compound 2                                                                        |            |
|--------------------------------------|-----------------------------------------------------------------------------------|-------------|-----------------------------------------------------------------------------------|------------|
| Temp (K)                             | 293                                                                               | 95          | 250                                                                               | 100        |
| formula                              | FePtC <sub>16</sub> N <sub>6</sub> O <sub>4</sub> H <sub>18</sub> Br <sub>2</sub> |             | FePdC <sub>16</sub> N <sub>6</sub> O <sub>4</sub> H <sub>18</sub> Br <sub>2</sub> |            |
| M                                    | 769.12                                                                            |             | 680.43                                                                            |            |
| cryst syst                           | tetragonal                                                                        |             | tetragonal                                                                        |            |
| space group                          | <i>P4/m</i>                                                                       |             | <i>P4/m</i>                                                                       |            |
| a, Å                                 | 7.4386(2)                                                                         | 7.3121(5)   | 7.4285(7)                                                                         | 7.2533(5)  |
| b, Å                                 | 7.4386(2)                                                                         | 7.3121(5)   | 7.4285(7)                                                                         | 7.2533(5)  |
| c, Å                                 | 13.733(2)                                                                         | 13.3878(18) | 13.648(3)                                                                         | 13.346(2)  |
| α, deg                               | 90                                                                                | 90          | 90                                                                                | 90         |
| β, deg                               | 90                                                                                | 90          | 90                                                                                | 90         |
| γ, deg                               | 90                                                                                | 90          | 90                                                                                | 90         |
| V, Å <sup>3</sup>                    | 759.88(13)                                                                        | 715.80(14)  | 753.1(2)                                                                          | 702.16(14) |
| Z                                    | 1                                                                                 | 1           | 1                                                                                 | 1          |
| D <sub>c</sub> , g cm <sup>-3</sup>  | 1.681                                                                             | 1.784       | 1.500                                                                             | 1.609      |
| μ, mm <sup>-1</sup>                  | 7.729                                                                             | 8.205       | 3.757                                                                             | 4.029      |
| F(000)                               | 362.0                                                                             | 362.0       | 330.0                                                                             | 330.0      |
| goodness-of-fit<br>on F <sup>2</sup> | 1.201                                                                             | 1.077       | 1.136                                                                             | 1.112      |
| R1 (I ≥ 2σ(I)) <sup>a</sup>          | 0.0757                                                                            | 0.0561      | 0.0672                                                                            | 0.0806     |
| wR2 (all data) <sup>a</sup>          | 0.1936                                                                            | 0.1554      | 0.2215                                                                            | 0.2422     |

a:  $I \geq 2\sigma(I)$ :  $R1 = \sum ||F_o| - |F_c|| / \sum |F_o|$ ,  $wR2 = \{ \sum [w(F_o^2 - F_c^2)^2] / \sum [w(F_o^2)^2] \}^{1/2}$ .

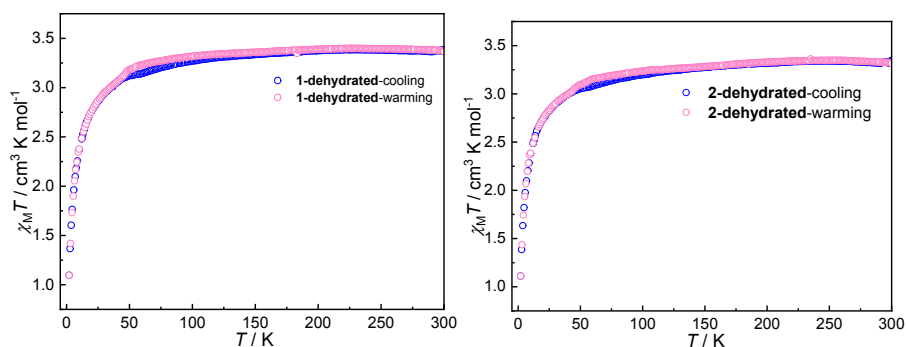

**Fig. S1** The  $\chi_M T$  versus  $T$  plots for compounds **1-dehydrated** and **2-dehydrated**.

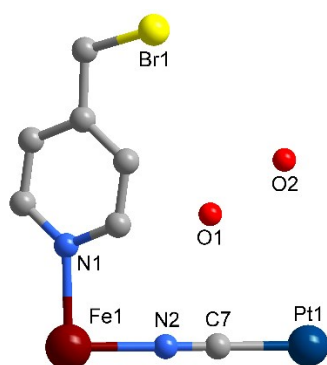

**Fig. S2** The asymmetric unit of compound **1**.

**Table S2.** The Fe<sup>II</sup>–N bond distances in compounds **1** and **2** at different temperature.

| $T / \text{K}$                          | Compound <b>1</b> |           | Compound <b>2</b> |           |
|-----------------------------------------|-------------------|-----------|-------------------|-----------|
|                                         | 293               | 95        | 250               | 100       |
| Fe <sup>II</sup> –N <sub>dbdp</sub> (Å) | 2.20(2)           | 2.022(12) | 2.129(11)         | 2.023(14) |
| Fe <sup>II</sup> –N <sub>NC</sub> (Å)   | 2.132(12)         | 2.032(11) | 2.132(7)          | 2.002(9)  |
| Fe <sup>II</sup> –N <sub>ave</sub> (Å)  | 2.167(6)          | 2.027(12) | 2.130(9)          | 2.013(12) |

**Table S3.** The Fe<sup>II</sup>–Fe<sup>II</sup> distances and  $\Sigma_{\text{Fe}}$  of {FeN<sub>6</sub>} at different temperature for compounds **1** and **2**.

| $T / \text{K}$                                  | Compound <b>1</b> |        | Compound <b>2</b> |        |
|-------------------------------------------------|-------------------|--------|-------------------|--------|
|                                                 | 293               | 95     | 250               | 100    |
| $d_1(\text{Fe}\cdots\text{Fe})$ (Å)             | 7.439             | 7.312  | 7.428             | 7.253  |
| $d_2(\text{Fe}\cdots\text{Fe})$ (Å)             | 13.733            | 13.388 | 13.648            | 13.346 |
| $\Sigma_{\text{Fe}}$ of {FeN <sub>6</sub> } (°) | 12.0              | 4.8    | 9.6               | 6.8    |

$$\sum_{i=1}^{12} |\varphi_i - 90^\circ|$$

**Table S4.** The host-host, host-guest and guest-guest interactions in compounds **1** and **2**.

|                | Compound <b>1</b> |          | Compound <b>2</b> |          |
|----------------|-------------------|----------|-------------------|----------|
|                | 293 K             | 95 K     | 250 K             | 100 K    |
| C1–H1···O1 (Å) | 2.62(7)           | 2.49(13) | 2.57(9)           | 2.44(8)  |
| Br1···Br1 (Å)  | 3.02(1)           | 2.75(9)  | 2.85(3)           | 2.66(7)  |
| O1···O2 (Å)    | 2.95(1)           | 2.86(17) | 3.13(2)           | 2.99(12) |

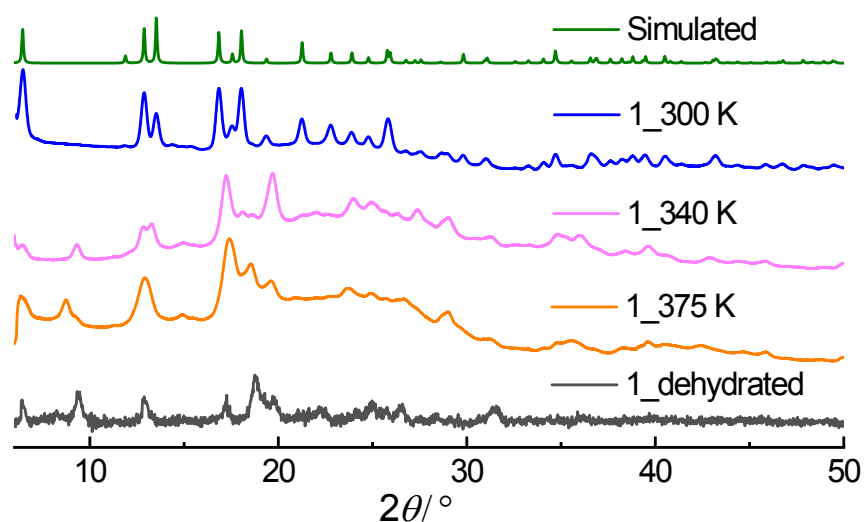

**Fig. S3** The PXRD patterns of compound **1** at different temperature.

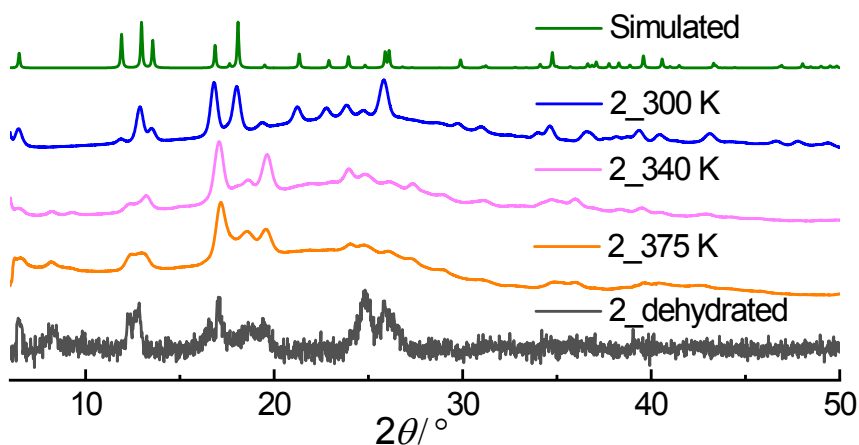

**Fig. S4** The PXRD patterns of compound **2** at different temperature.

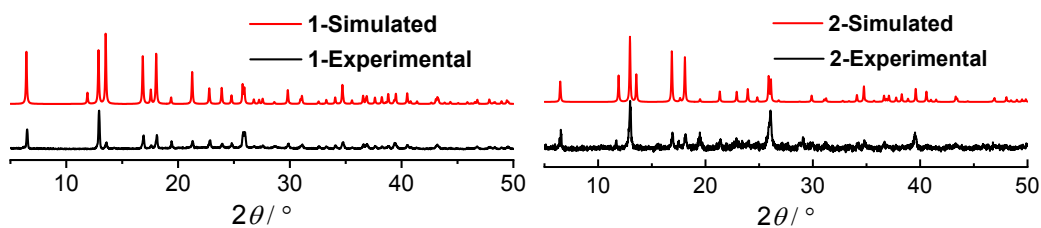

**Fig. S5** The PXRD data of compounds **1** and **2** at room temperature collected for each batch.

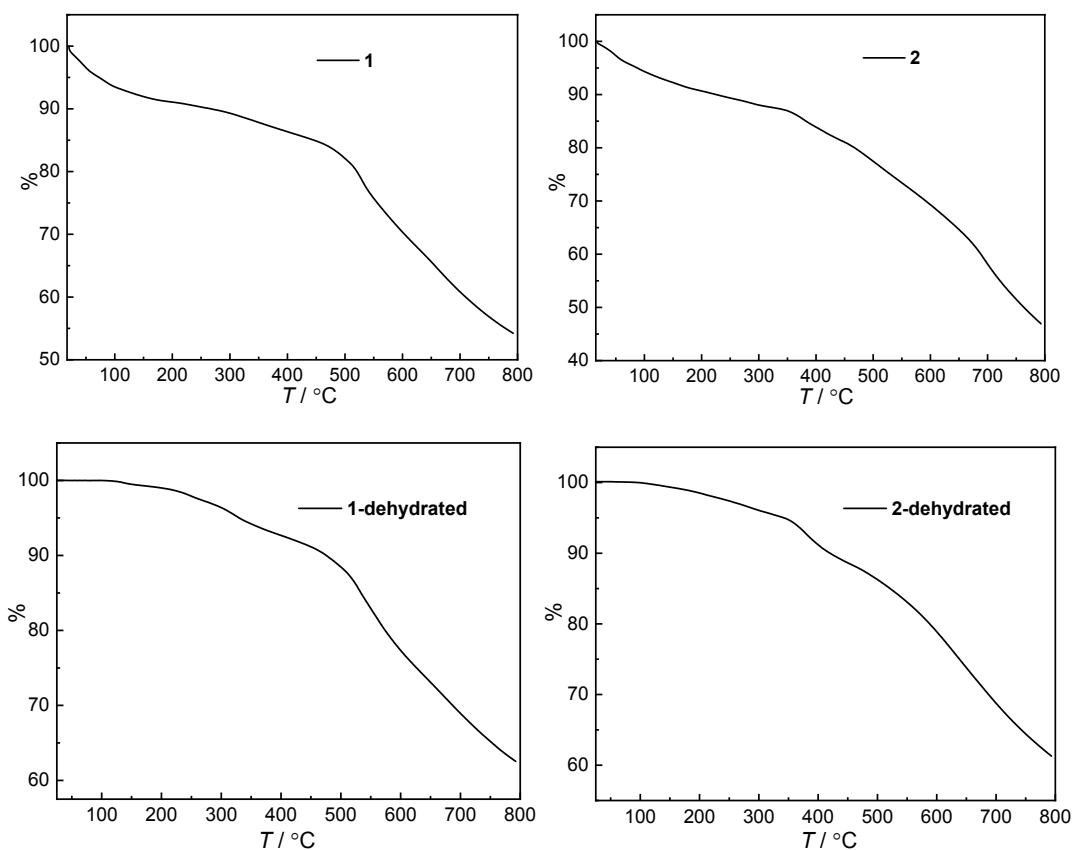

**Fig. S6** The TGA plots of compounds **1**, **2** and the dehydrated samples.

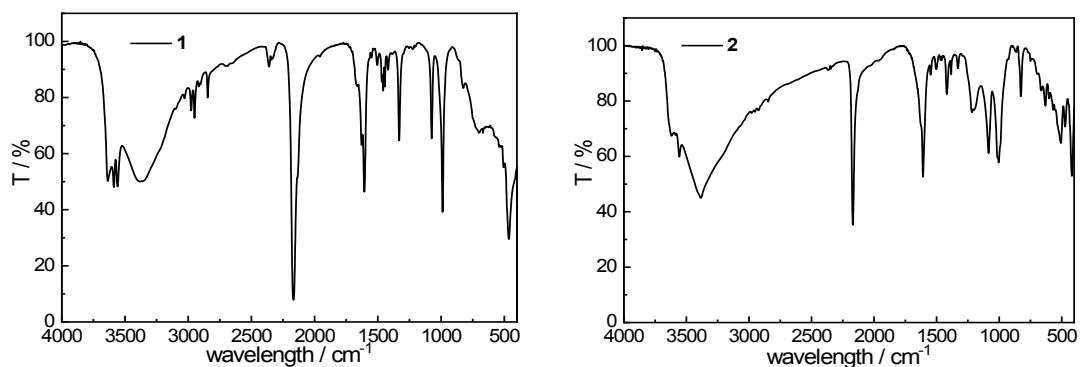

**Fig. S7** The FIT-IR plots of compounds **1** and **2**.
